# Supplementary material
Source: PubMed Central journal article supplement (PMC4948988)

Supplemental Figure 1. Breath Hydrogen Levels in Lean Controls

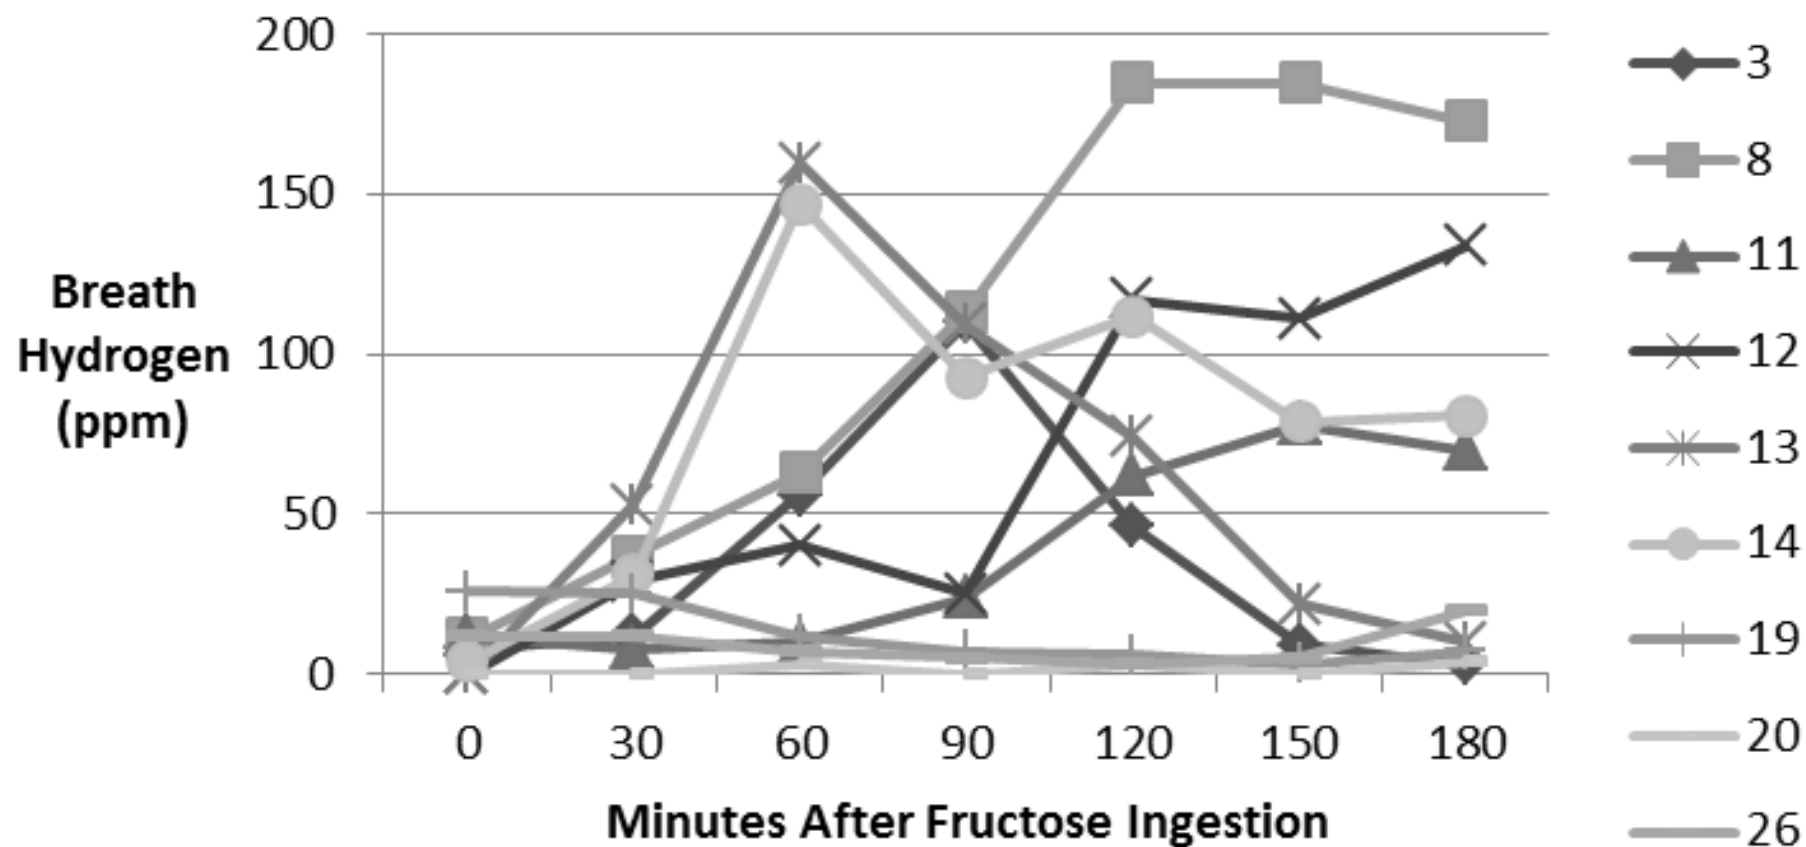

Supplement: NIHMS592843-supplement-Supp_FigureS1.pdf [file NIHMS592843-supplement-Supp_FigureS1.pdf]

Supplemental Figure 2. Breath Hydrogen Levels in Obese Controls

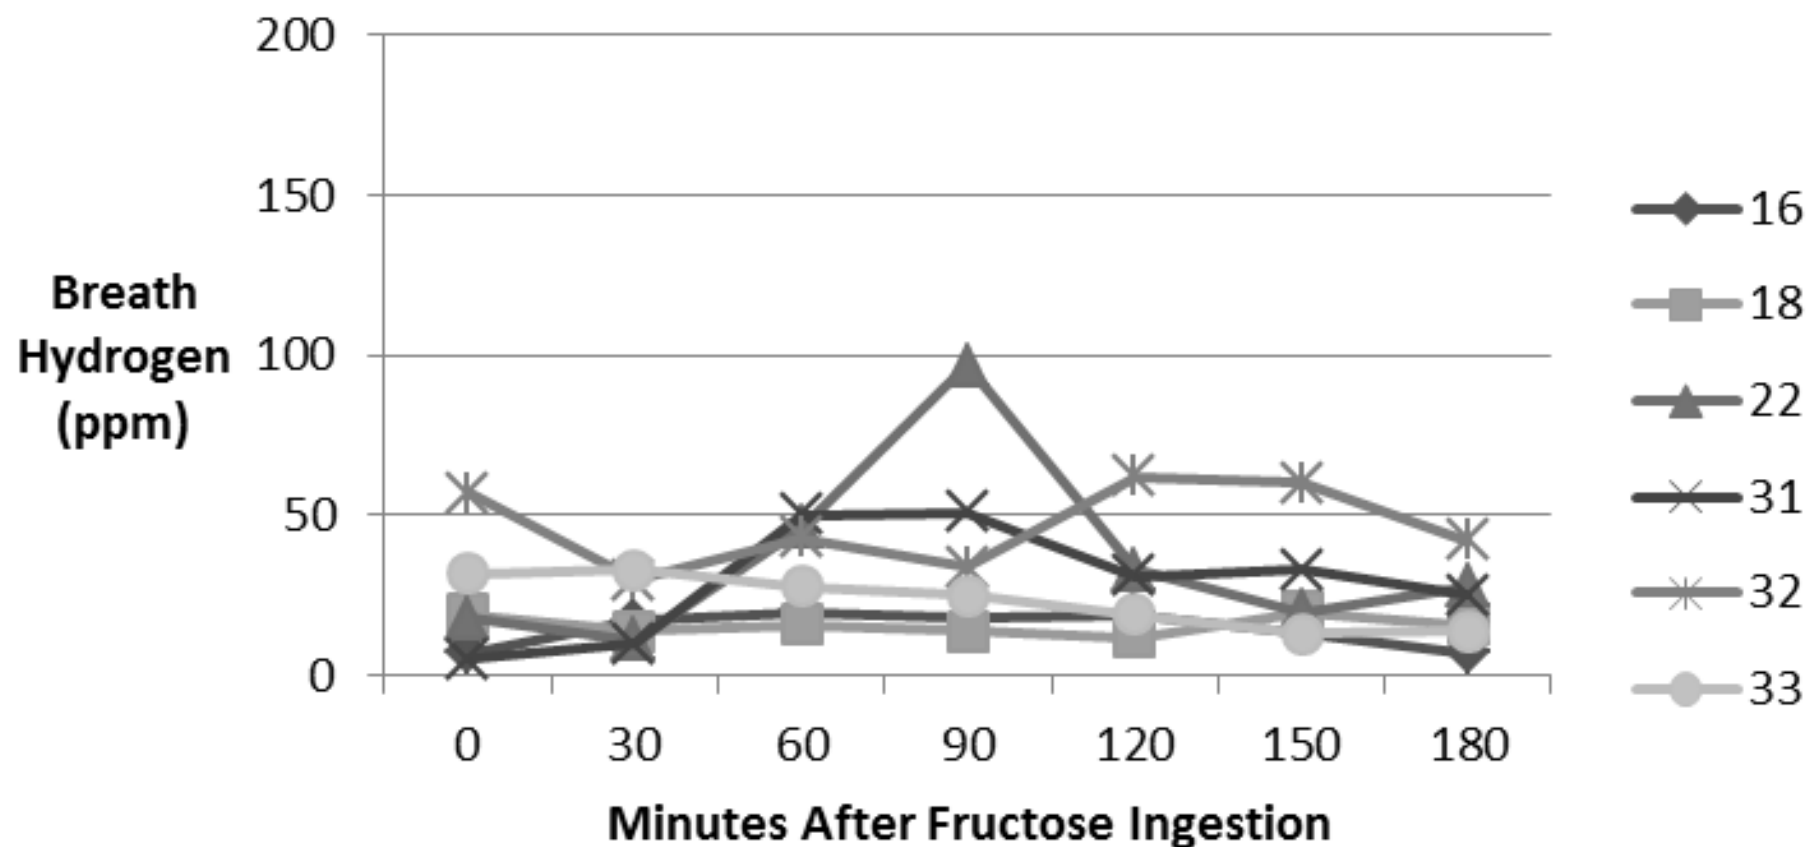

Supplement: NIHMS592843-supplement-Supp_FigureS2.pdf [file NIHMS592843-supplement-Supp_FigureS2.pdf]

Supplemental Figure 3. Breath Hydrogen Levels in NAFLD Subjects

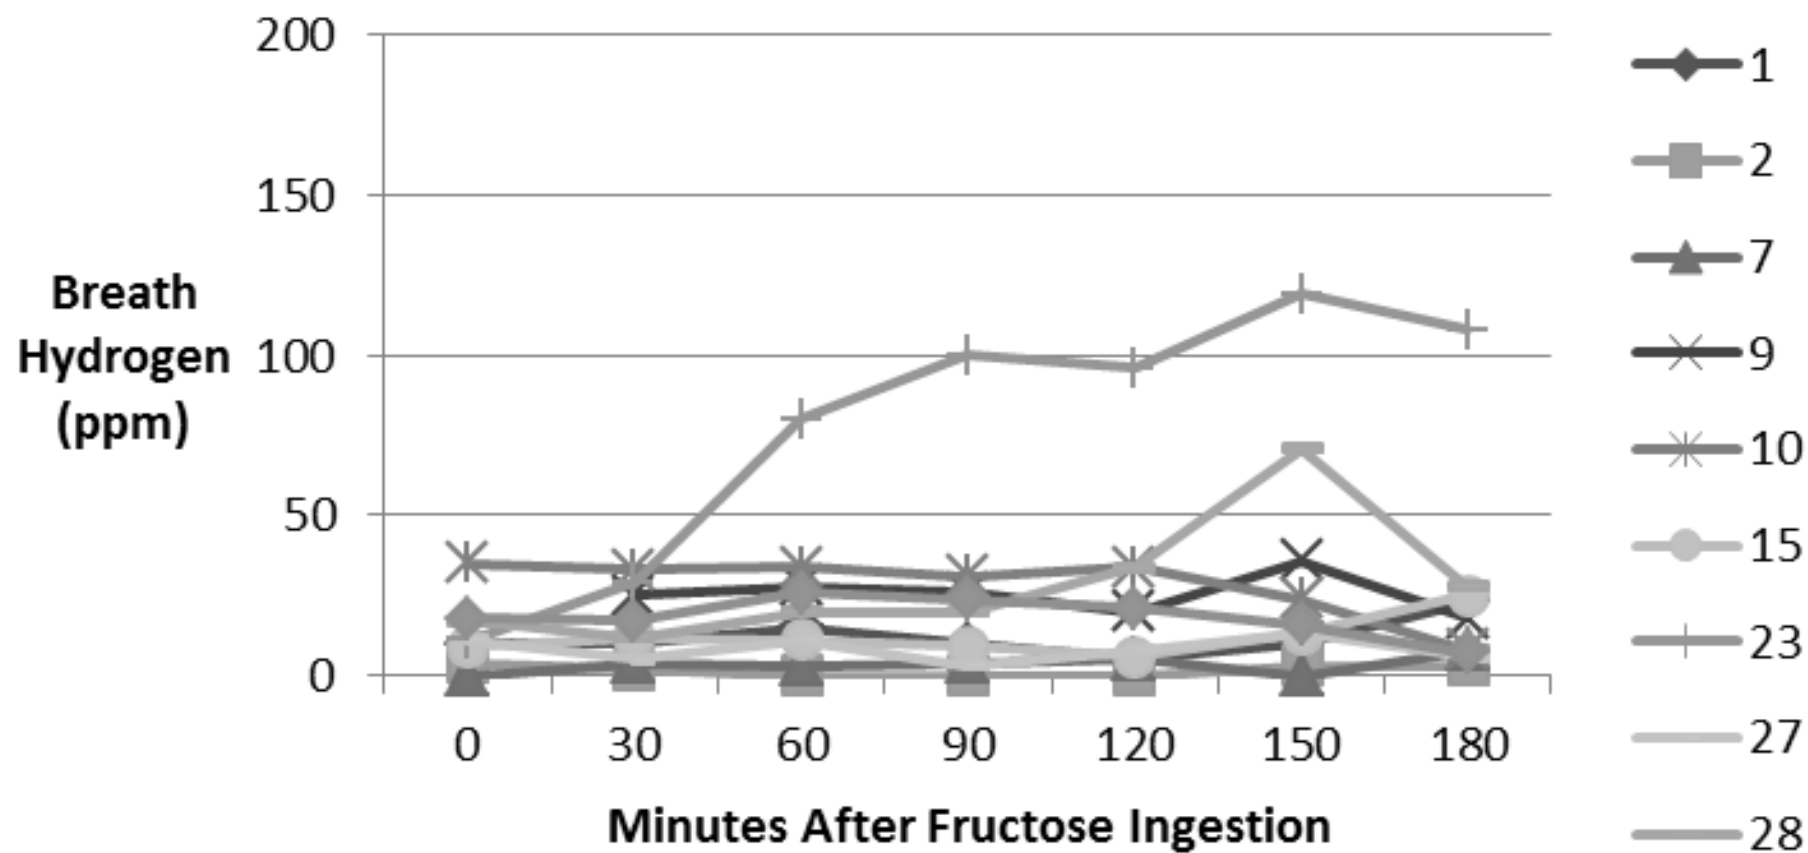

Supplement: NIHMS592843-supplement-Supp_FigureS3.pdf [file NIHMS592843-supplement-Supp_FigureS3.pdf]
